# Supplementary material
Source: PubMed Central journal article supplement (PMC4834581)
Supplement: Supp_Table1.pdf [file Supp_Table1.pdf]

Suppl Table 1. Gene list of RT<sup>2</sup> Profiler™ Human Growth Factors PCR Array

| <b>Symbol</b> | <b>Description</b>                                                 |
|---------------|--------------------------------------------------------------------|
| ACTB          | Actin, beta                                                        |
| AMH           | Anti-Mullerian hormone                                             |
| B2M           | Beta-2-microglobulin                                               |
| BDNF          | Brain-derived neurotrophic factor                                  |
| BMP1          | Bone morphogenetic protein 1                                       |
| BMP10         | Bone morphogenetic protein 10                                      |
| BMP2          | Bone morphogenetic protein 2                                       |
| BMP3          | Bone morphogenetic protein 3                                       |
| BMP4          | Bone morphogenetic protein 4                                       |
| BMP5          | Bone morphogenetic protein 5                                       |
| BMP6          | Bone morphogenetic protein 6                                       |
| BMP7          | Bone morphogenetic protein 7                                       |
| BMP8B         | Bone morphogenetic protein 8b                                      |
| CECR1         | Cat eye syndrome chromosome region, candidate 1                    |
| CLC           | Charcot-Leyden crystal protein                                     |
| CSF1          | Colony stimulating factor 1 (macrophage)                           |
| CSF2          | Colony stimulating factor 2 (granulocyte-macrophage)               |
| CSF3          | Colony stimulating factor 3 (granulocyte)                          |
| CSPG5         | Chondroitin sulfate proteoglycan 5 (neuroglycan C)                 |
| CXCL1         | Chemokine (C-X-C motif) ligand 1 (melanoma growth stimulating)     |
| DKK1          | Dickkopf homolog 1 ( <i>Xenopus laevis</i> )                       |
| ERAP1         | Endoplasmic reticulum aminopeptidase 1                             |
| EREG          | Epiregulin                                                         |
| FGF1          | Fibroblast growth factor 1 (acidic)                                |
| FGF11         | Fibroblast growth factor 11                                        |
| FGF13         | Fibroblast growth factor 13                                        |
| FGF14         | Fibroblast growth factor 14                                        |
| FGF17         | Fibroblast growth factor 17                                        |
| FGF19         | Fibroblast growth factor 19                                        |
| FGF2          | Fibroblast growth factor 2 (basic)                                 |
| FGF22         | Fibroblast growth factor 22                                        |
| FGF23         | Fibroblast growth factor 23                                        |
| FGF5          | Fibroblast growth factor 5                                         |
| FGF6          | Fibroblast growth factor 6                                         |
| FGF7          | Fibroblast growth factor 7 (keratinocyte growth factor)            |
| FGF9          | Fibroblast growth factor 9 (glia-activating factor)                |
| FIGF          | C-fos induced growth factor (vascular endothelial growth factor D) |
| GAPDH         | Glyceraldehyde-3-phosphate dehydrogenase                           |
| GDF10         | Growth differentiation factor 10                                   |
| GDF11         | Growth differentiation factor 11                                   |
| GDNF          | Glial cell derived neurotrophic factor                             |
| GPI           | Glucose phosphate isomerase                                        |
| HBEGF         | Heparin-binding EGF-like growth factor                             |
| IGF1          | Insulin-like growth factor 1 (somatomedin C)                       |

|         |                                                                 |
|---------|-----------------------------------------------------------------|
| IGF2    | Insulin-like growth factor 2 (somatomedin A)                    |
| IL10    | Interleukin 10                                                  |
| IL11    | Interleukin 11                                                  |
| IL12B   | Interleukin 12B                                                 |
| IL18    | Interleukin 18 (interferon-gamma-inducing factor)               |
| IL1A    | Interleukin 1, alpha                                            |
| IL1B    | Interleukin 1, beta                                             |
| IL2     | Interleukin 2                                                   |
| IL3     | Interleukin 3 (colony-stimulating factor, multiple)             |
| IL4     | Interleukin 4                                                   |
| INH A   | Inhibin, alpha                                                  |
| INH B A | Inhibin, beta A                                                 |
| INH B B | Inhibin, beta B                                                 |
| JAG1    | Jagged 1 (Alagille syndrome)                                    |
| JAG2    | Jagged 2                                                        |
| LEFTY1  | Left-right determination factor 1                               |
| LEFTY2  | Left-right determination factor 2                               |
| LIF     | Leukemia inhibitory factor (cholinergic differentiation factor) |
| LTBP4   | Latent transforming growth factor beta binding protein 4        |
| MDK     | Midkine (neurite growth-promoting factor 2)                     |
| MSTN    | Myostatin                                                       |
| NDP     | Norrie disease (pseudoglioma)                                   |
| NGF     | Nerve growth factor (beta polypeptide)                          |
| NODAL   | Nodal homolog (mouse)                                           |
| NRG1    | Neuregulin 1                                                    |
| NRG2    | Neuregulin 2                                                    |
| NRG3    | Neuregulin 3                                                    |
| NRTN    | Neurturin                                                       |
| NTF3    | Neurotrophin 3                                                  |
| OSGIN1  | Oxidative stress induced growth inhibitor 1                     |
| PDGFC   | Platelet derived growth factor C                                |
| PGF     | Placental growth factor                                         |
| PSPN    | Persephin                                                       |
| PTN     | Pleiotrophin                                                    |
| SLCO1A2 | Solute carrier organic anion transporter family, member 1A2     |
| SPP1    | Secreted phosphoprotein 1                                       |
| TDGF1   | Teratocarcinoma-derived growth factor 1                         |
| TGFB1   | Transforming growth factor, beta 1                              |
| THPO    | Thrombopoietin                                                  |
| TNNT1   | Troponin T type 1 (skeletal, slow)                              |
| TYMP    | Thymidine phosphorylase                                         |
| VEGFA   | Vascular endothelial growth factor A                            |
| VEGFC   | Vascular endothelial growth factor C                            |
| HPRT1*  | Hypoxanthine phosphoribosyltransferase 1                        |
| RPL13A* | Ribosomal protein L13a                                          |

\* denotes endogenous controls.
